# Supplementary material
Source: PubMed Central journal article supplement (PMC4505686)
Supplement: cn500369h_si_002.pdf [file cn500369h_si_002.pdf]

## Supplementary Figures

**Fig S1:**

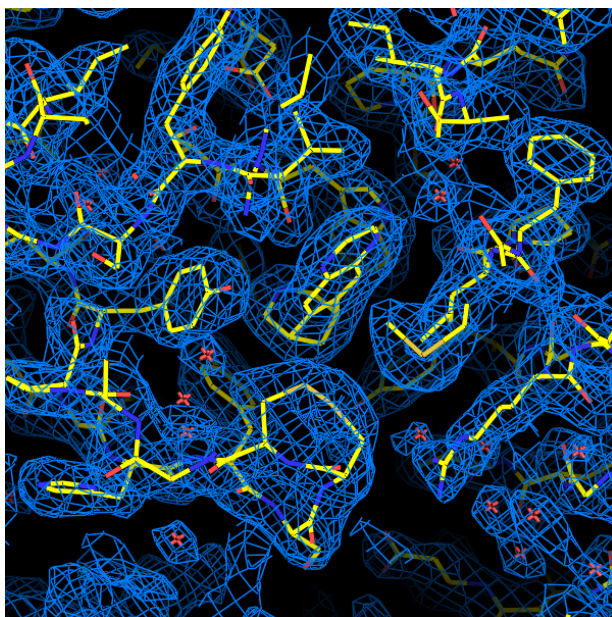

Electron density of varenicline (centre) in the 5-HTBP binding pocket.

**Fig S2:**

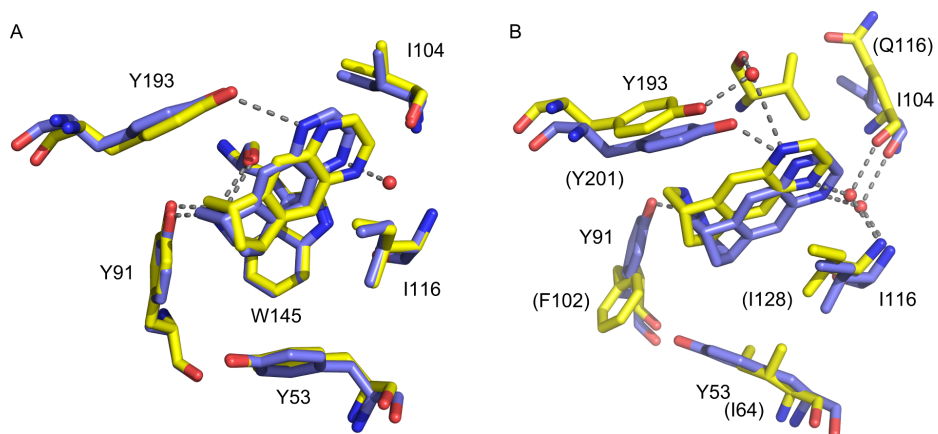

Structural alignments of varenicline-bound 5-HTBP (blue) with varenicline-bound AChBP (yellow) structures. A. Alignment with Ac-AChBP; 4AFT (yellow). B. Alignment with Ct-AChBP 4AFG (yellow). The numbering of the Ct-AChBP is shown in brackets.
